# Supplementary material
Source: Springer Nature journal article supplement (https://www.springermedizin.de/resource/supplementary/12943_2009_534_MOESM1_ESM.pdf/9554622)

# A ATP assay

# B PI/annexin assay

# C phase contrast

HL60

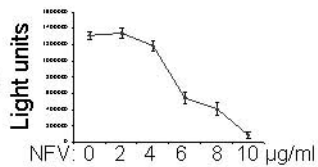

control

nelfinavir

control

nelfinavir

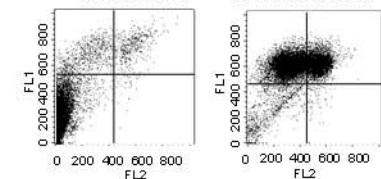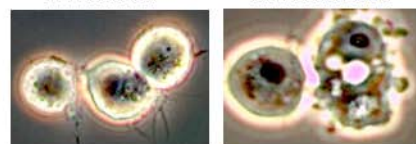

IM9

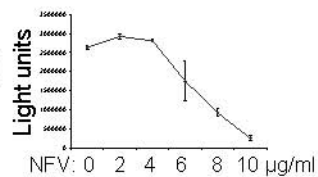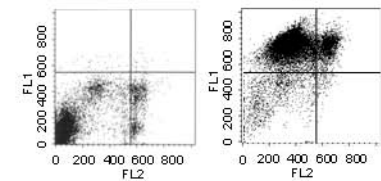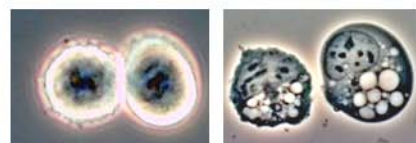

Jurkat

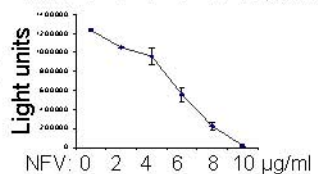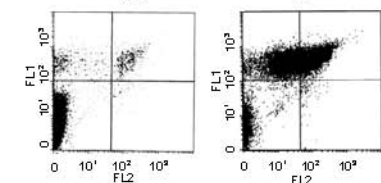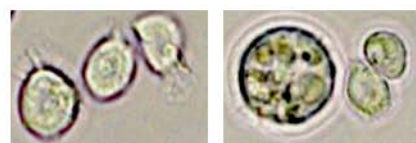

BMC

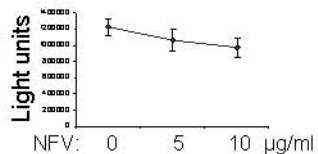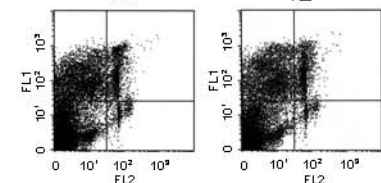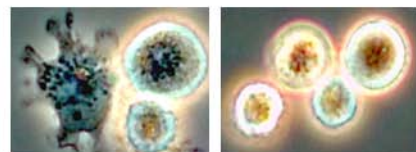

Supplement: MOESM1 [file 9554622]
